# Supplementary material for: Frailty and inflammatory markers in older adults with cancer
Source: publisher site journal article supplement (doi:10.18632/aging.101162), 2017-03-08
Supplement: Supplementary file 1 [file aging-v9i3-101162-supplementary-material-SD1.pdf]

## SUPPLEMENTARY MATERIAL

**Supplementary Table S1. Carolina Frailty Index Variables.**

| Item                                                 | Format                          | Score |
|------------------------------------------------------|---------------------------------|-------|
| <b>Can you use a telephone</b>                       | Without help                    | 0     |
|                                                      | With some help                  | 1     |
|                                                      | Unable                          | 1     |
| <b>Can you get to places out of walking distance</b> | Without help                    | 0     |
|                                                      | With some help                  | 1     |
|                                                      | Unable                          | 1     |
| <b>Can you go shopping for groceries or clothes</b>  | Without help                    | 0     |
|                                                      | With some help                  | 1     |
|                                                      | Unable                          | 1     |
| <b>Can you prepare your own meals</b>                | Without help                    | 0     |
|                                                      | With some help                  | 1     |
|                                                      | Unable                          | 1     |
| <b>Can you do housework</b>                          | Without help                    | 0     |
|                                                      | With some help                  | 1     |
|                                                      | Unable                          | 1     |
| <b>Can you take your own medicines</b>               | Without help                    | 0     |
|                                                      | With some help                  | 1     |
|                                                      | Unable                          | 1     |
| <b>Can you handle your own money</b>                 | Without help                    | 0     |
|                                                      | With some help                  | 1     |
|                                                      | Unable                          | 1     |
| <b>Lifting or carrying groceries</b>                 | Not limited at all              | 0     |
|                                                      | Limited a little                | 1     |
|                                                      | Limited a lot                   | 1     |
| <b>Climbing one flight of stairs</b>                 | Not limited at all              | 0     |
|                                                      | Limited a little                | 1     |
|                                                      | Limited a lot                   | 1     |
| <b>Bending, kneeling, or stooping</b>                | Not limited at all              | 0     |
|                                                      | Limited a little                | 1     |
|                                                      | Limited a lot                   | 1     |
| <b>Walking one block</b>                             | Not limited at all              | 0     |
|                                                      | Limited a little                | 1     |
|                                                      | Limited a lot                   | 1     |
| <b>Bathing or dressing yourself</b>                  | Not limited at all              | 0     |
|                                                      | Limited a little                | 1     |
|                                                      | Limited a lot                   | 1     |
| <b>Self reported Health</b>                          | Normal                          | 0     |
|                                                      | Minor symptoms of disease       | 0     |
|                                                      | Some symptoms of disease        | 0.5   |
|                                                      | Care for self only              | 1     |
|                                                      | require occasional assistance   | 1     |
|                                                      | require considerable assistance | 1     |
|                                                      | disable                         | 1     |
| severely disabled                                    | 1                               |       |
| <b>Falls in the last 6 months</b>                    | 0                               | 0     |
|                                                      | 1 or more                       | 1     |
| <b>Number of Daily Medications</b>                   | 0-8                             | 0     |
|                                                      | >9                              | 1     |
| <b>Other cancers or leukemia</b>                     | No                              | 0     |
|                                                      | Yes                             | 1     |
| <b>Arthritis or Rheumatism</b>                       | No                              | 0     |
|                                                      | Yes                             | 1     |

| Item                                                                 | Format               | Score |
|----------------------------------------------------------------------|----------------------|-------|
| <b>Glaucoma</b>                                                      | No                   | 0     |
|                                                                      | Yes                  | 1     |
| <b>Emphysema or chronic bronchitis</b>                               | No                   | 0     |
|                                                                      | Yes                  | 1     |
| <b>High blood pressure</b>                                           | No                   | 0     |
|                                                                      | Yes                  | 1     |
| <b>Heart Disease</b>                                                 | No                   | 0     |
|                                                                      | Yes                  | 1     |
| <b>Circulation trouble in arms or legs</b>                           | No                   | 0     |
|                                                                      | Yes                  | 1     |
| <b>Diabetes</b>                                                      | No                   | 0     |
|                                                                      | Yes                  | 1     |
| <b>Stomach or intestinal disorders</b>                               | No                   | 0     |
|                                                                      | Yes                  | 1     |
| <b>Osteoporosis</b>                                                  | No                   | 0     |
|                                                                      | Yes                  | 1     |
| <b>Chronic liver or kidney disease</b>                               | No                   | 0     |
|                                                                      | Yes                  | 1     |
| <b>Stroke</b>                                                        | No                   | 0     |
|                                                                      | Yes                  | 1     |
| <b>Depression</b>                                                    | No                   | 0     |
|                                                                      | Yes                  | 1     |
| <b>Hearing</b>                                                       | Excellent            | 0     |
|                                                                      | Good                 | 0     |
|                                                                      | Fair                 | 1     |
|                                                                      | Poor                 | 1     |
|                                                                      | Totally Deaf         | 1     |
| <b>Vision</b>                                                        | Excellent            | 0     |
|                                                                      | Good                 | 0     |
|                                                                      | Fair                 | 1     |
|                                                                      | Poor                 | 1     |
|                                                                      | Totally Blind        | 1     |
| <b>Unintentional Weight Loss</b>                                     | No                   | 0     |
|                                                                      | Yes < 5%             | 0     |
|                                                                      | Yes > 5%             | 1     |
| <b>Felt downhearted or blue</b>                                      | None of time         | 0     |
|                                                                      | A little of the time | 0     |
|                                                                      | Some of the time     | 0.5   |
|                                                                      | A good bit of time   | 1     |
|                                                                      | Most of the time     | 1     |
|                                                                      | All of the time      | 1     |
| <b>Felt calm or peaceful</b>                                         | All of the time      | 0     |
|                                                                      | Most of the time     | 0     |
|                                                                      | A good bit of time   | 0     |
|                                                                      | Some of the time     | 0.5   |
|                                                                      | A little of the time | 1     |
|                                                                      | None of the time     | 1     |
| <b>Physical or emotional health interfere with social activities</b> | None of time         | 0     |
|                                                                      | A little of the time | 0     |
|                                                                      | Some of the time     | 0.5   |
|                                                                      | Most of the time     | 1     |
|                                                                      | All of the time      | 1     |
|                                                                      |                      |       |
| <b>Blessed-Orientation-Memory-Concentration</b>                      | Less than 11         | 0     |
|                                                                      | 11 or greater        | 1     |

| Item                              | Format        | Score |
|-----------------------------------|---------------|-------|
| <b>Timed up and go</b>            | Less than 14  | 0     |
|                                   | 14 or greater | 1     |
| <b>Total Number of Items = 36</b> |               |       |

Coding of Variables is as follows:

- "0" = absence of deficit
- "1" = presence of deficit
- "0.5" is used for intermediate responses
- Add up scores for each patient and divide by number of variables to achieve a frailty index score
